# Supplementary material for: Systematic drug screening reveals specific vulnerabilities and co-resistance patterns in endocrine-resistant breast cancer
Source: PubMed Central journal article supplement (PMC4932681; doi:10.1186/s12885-016-2452-5), 2016-07-04

**A** MCF-7 Tam1 vs MCF-7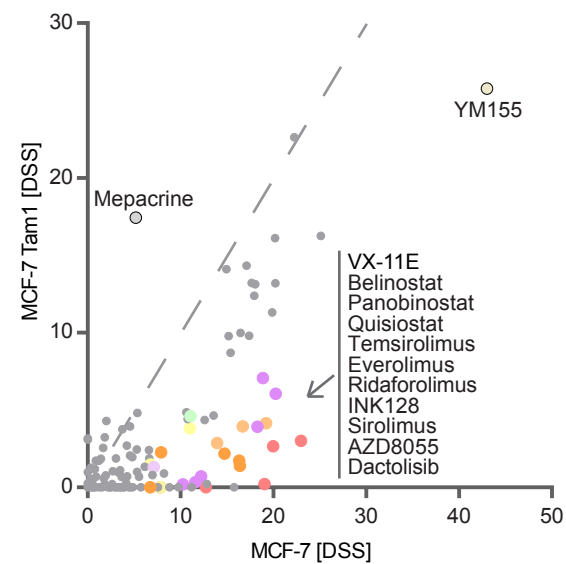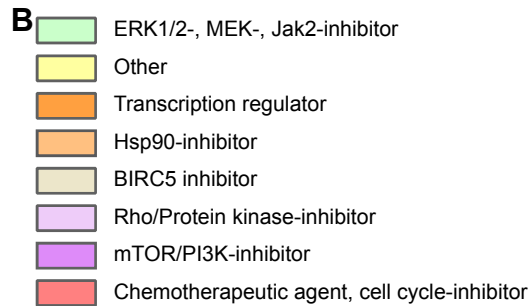**C**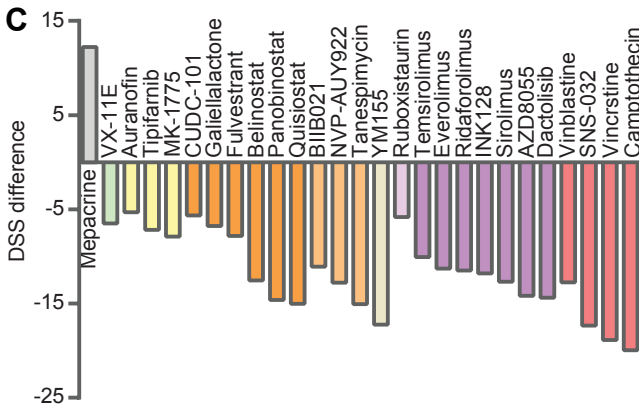**D**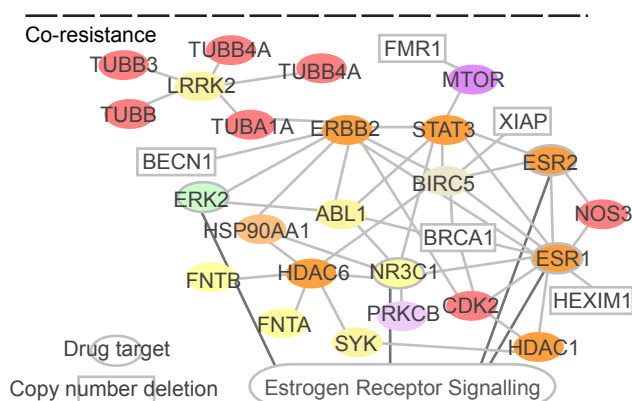

Supplement: 12885_2016_2452_MOESM11_ESM.pdf [file 12885_2016_2452_MOESM11_ESM.pdf]
