# Supplementary material for: Systematic drug screening reveals specific vulnerabilities and co-resistance patterns in endocrine-resistant breast cancer
Source: PubMed Central journal article supplement (PMC4932681; doi:10.1186/s12885-016-2452-5), 2016-07-04

**A** ZR-75-1 Tam1 vs ZR-75-1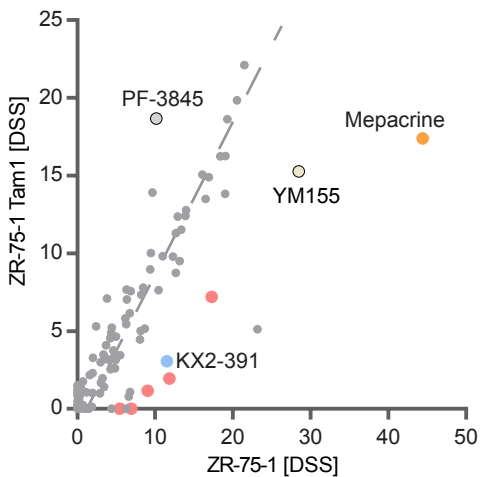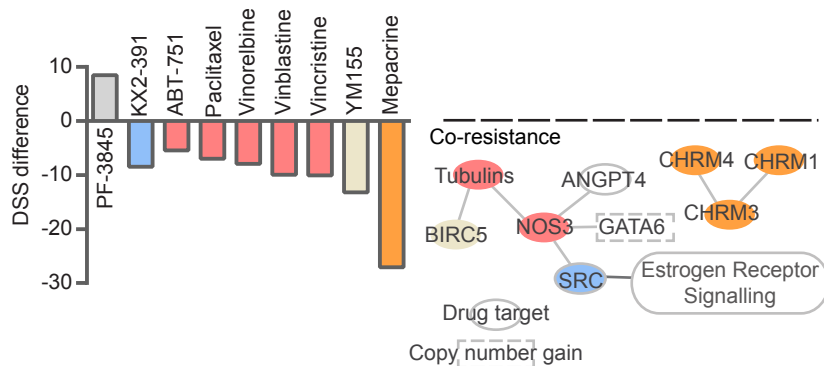**B**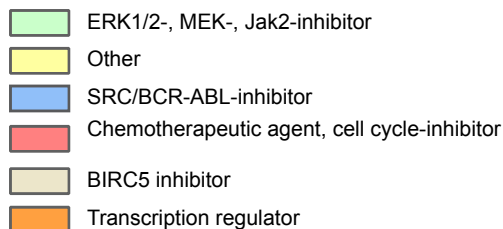**C** ZR-75-1 Tam2 vs ZR-75-1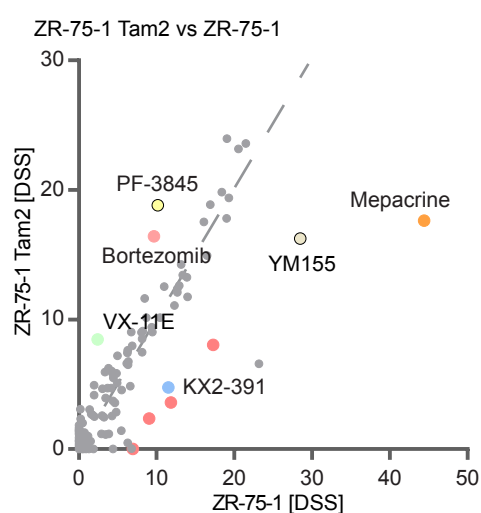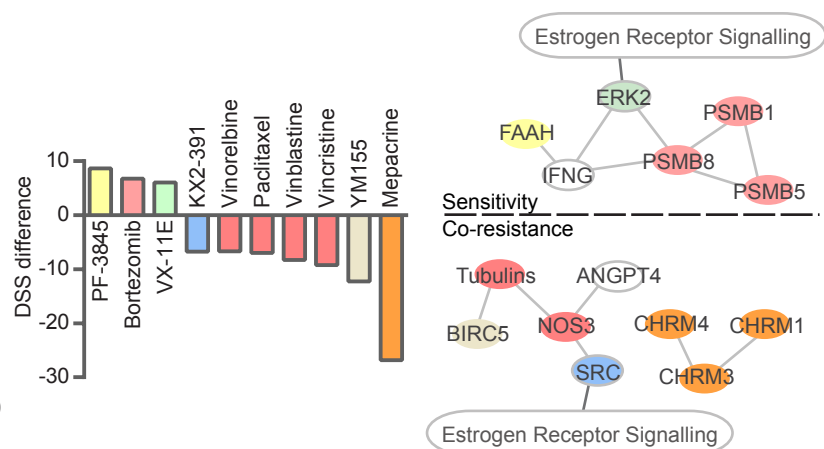

Supplement: 12885_2016_2452_MOESM12_ESM.pdf [file 12885_2016_2452_MOESM12_ESM.pdf]
