# Supplementary material for: Systematic drug screening reveals specific vulnerabilities and co-resistance patterns in endocrine-resistant breast cancer
Source: Springer Nature journal article supplement (doi:10.1186/s12885-016-2452-5), 2016-07-04

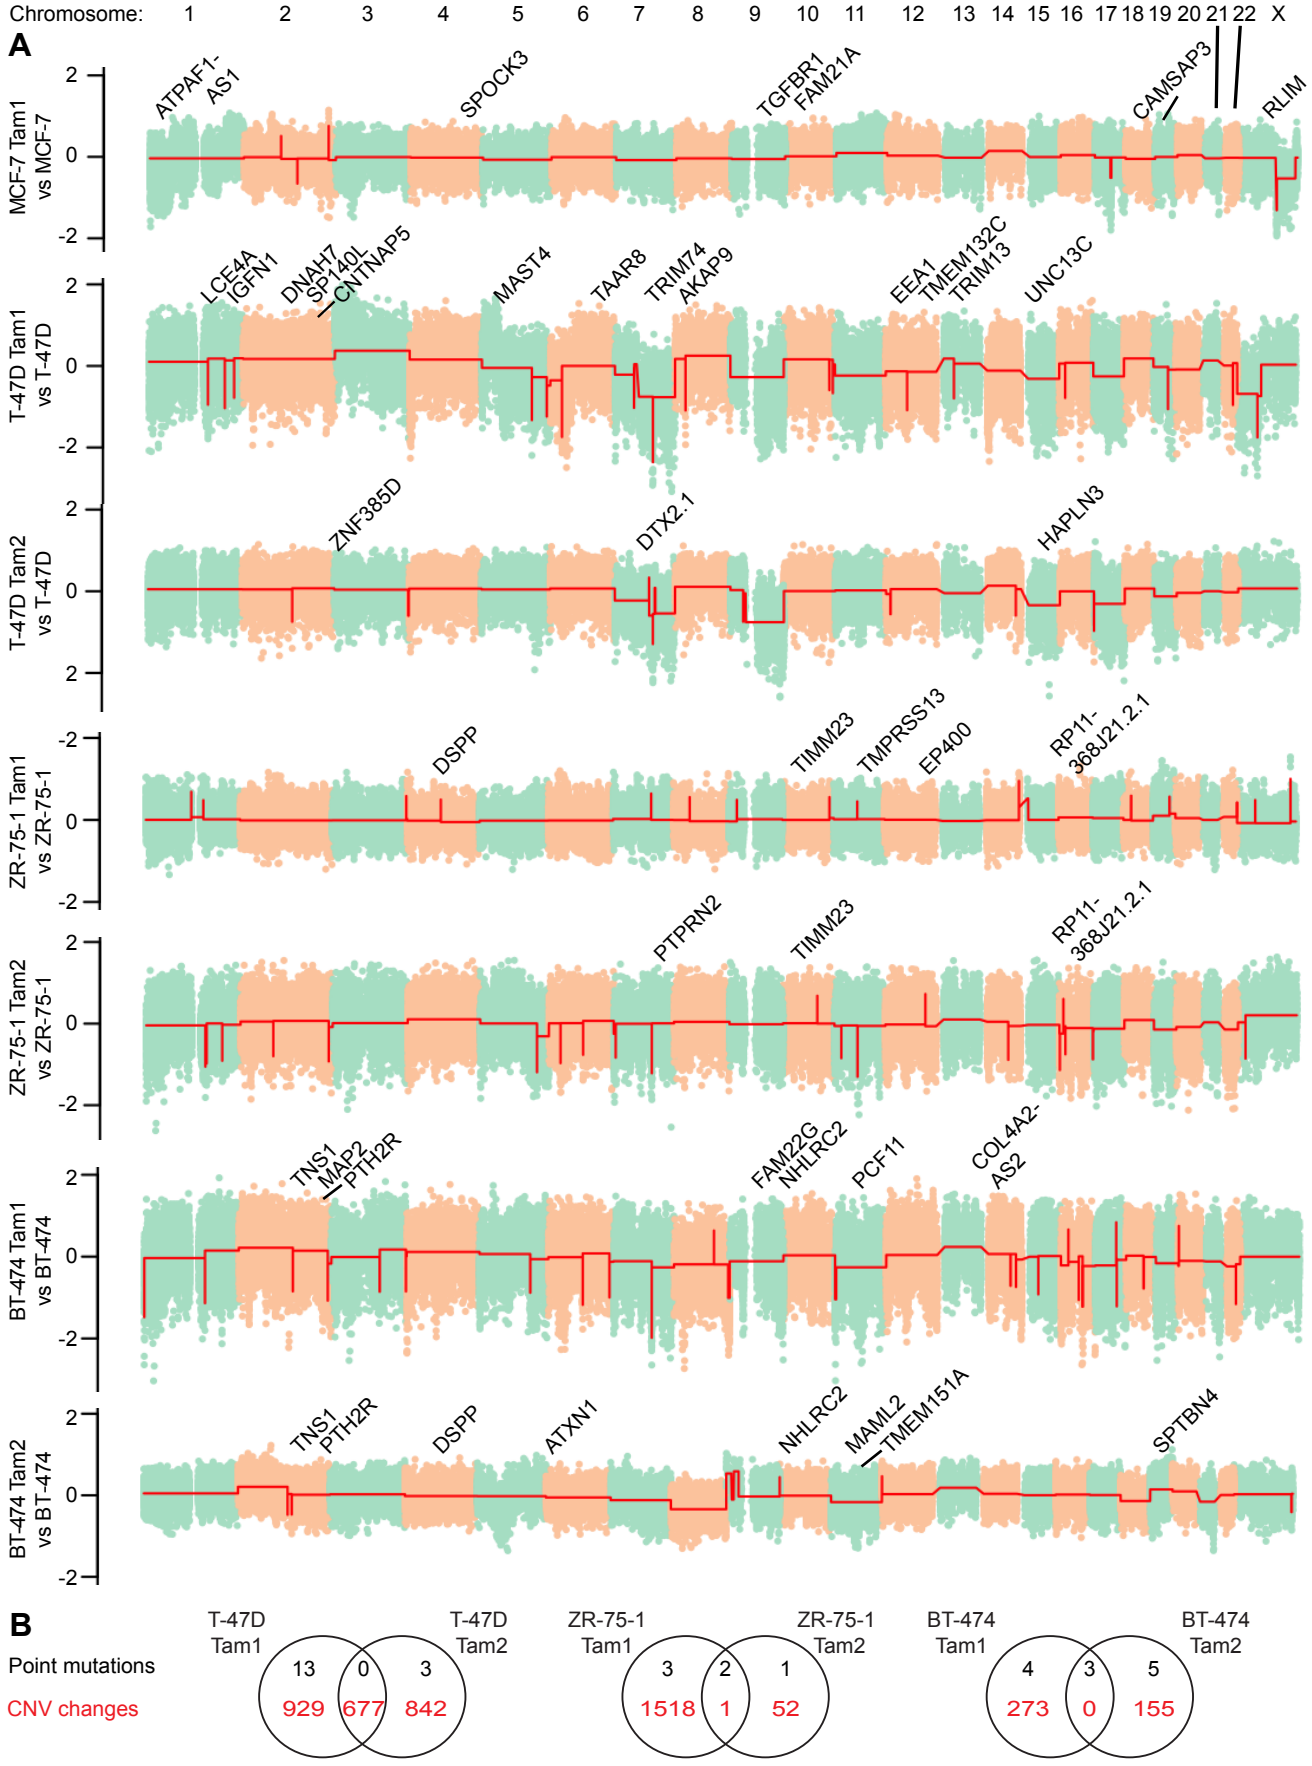

Supplement: MOESM8 [file 10333092]
